# Supplementary material
Source: publisher figshare collection journal article supplement (https://gsajournals.figshare.com/ndownloader/files/12264293)
Supplement: Supplementary file 1 [file 12264293]

## Sheet: herm_cluster1-1000000000
Analysis of the comparison between NEXTDB in situ images to transcriptome data
Profile 1000000000
Colomn E indicates whether there is an informative image of an adult worm in NEXTDB (- for no, + for yes)
Colomn F indicates whether in this image there is a specific staining of the gonad (- for no, + for yes, ? For undetermined)
Colomn G indicates the estimation of the region in the gonad in which staining was enriched (1-10 corresponds to the sections according to the main manuscript, ? Undetermined)
	Open reading frame	wbgene	Gene name	Stained adult worm image in NEXTDB	Specific gonad staining on adult worm	Estimated sections enriched staining
	F59D8.1	WBGene00006927	vit-3	-	-
	F40F8.5	WBGene00009578		+	+	1-10
	T02E1.8	WBGene00011380		-	-
	C04F6.1	WBGene00006929	vit-5	-	-
	F59D8.2	WBGene00006928	vit-4	+	?	?
	W07B8.5	WBGene00000785	cpr-5	+	-
	T25C8.2	WBGene00000067	act-5	+	-
	C49A9.9	WBGene00016763		-	-
	K07H8.6	WBGene00006930	vit-6	+	-
	K09F5.2	WBGene00006925	vit-1	+	-
	Y71G12B.24	WBGene00022159	mppa-1	-	-
	C53A5.2	WBGene00008263		+	+	1-10
	W03G11.4	WBGene00012226		-	-
	R12H7.2	WBGene00000217	asp-4	-	-
	W08E12.1	WBGene00021082	zip-11	-	-
	C42D8.2	WBGene00006926	vit-2	+	-
	F37B4.7	WBGene00018138	folt-2	+	-
	Y39B6A.20	WBGene00000214	asp-1	+	-
	Y59C2A.1	WBGene00021984		+	-
	C16A11.9	WBGene00045297	fbxc-43	-	-
	C34B4.2	WBGene00007907		-	-
	F30A10.8	WBGene00006062	stn-1	+	+	1-4
	Y34F4.5	WBGene00021340		-	-
	C55B7.9	WBGene00007018	mdt-18	-	-
	F20D12.5	WBGene00017644	exc-9	+	+	1?
	Y73F8A.26	WBGene00013531		-	-
	T09B4.9	WBGene00020383		+	+	1-4
	C37C3.6	WBGene00003242	mig-6	+	-
	Y39B6A.35	WBGene00006567	tgt-2	-	-
	B0035.18	WBGene00044290		-	-
	B0047.1	WBGene00015012	bath-20	-	-
	C23H3.9	WBGene00016022		+	+	1-4

## Sheet: herm_cluster2-1100000000
Analysis of the comparison between NEXTDB in situ images to transcriptome data
Profile 1100000000
Colomn E indicates whether there is an informative image of an adult worm in NEXTDB (- for no, + for yes)
Colomn F indicates whether in this image there is a specific staining of the gonad (- for no, + for yes, ? For undetermined)
Colomn G indicates the estimation of the region in the gonad in which staining was enriched (1-10 corresponds to the sections according to the main manuscript, ? Undetermined)
	Open reading frame	wbgene	Gene name	Stained adult worm image in NEXTDB	Specific gonad staining on adult worm	Estimated sections enriched staining
	F32E10.9	WBGene00043068		-	-
	Y73B6BL.9	WBGene00001853	hil-2	+	+	1-2,6-7
	C56A3.8	WBGene00008346		-	-
	C46A5.6	WBGene00016702		-	-
	W07E6.1	WBGene00021073	nol-1	+	+	1-5
	C43E11.9	WBGene00016607		-	-
	F21H12.5	WBGene00001402	fbf-2	+	+	1-10
	F07F6.7	WBGene00017219		-	-
	ZK637.10	WBGene00014028	trxr-2	-	-
	W07E6.2	WBGene00021074		-	-
	C06A5.4	WBGene00015502	madf-7	-	-
	K07C5.4	WBGene00010627		+	+	1-10
	T23G11.11	WBGene00077728		-	-
	Y37H9A.1	WBGene00012576		+	+	1-5
	T23G4.3	WBGene00011959		-	-
	Y48G9A.4	WBGene00021698	frl-1	+	+	1-5
	T07A9.9	WBGene00020297		+	+	1-5
	Y55F3AM.11	WBGene00021928		-	-
	W01B11.3	WBGene00020915	nol-5	+	+	1-5
	F45G2.9	WBGene00009735		-	-
	M117.6	WBGene00044253		-	-
	F56D12.1	WBGene00000112	alh-6	-	-
	Y48G1C.8	WBGene00021681		-	-
	T28D9.1	WBGene00020894		+	+	1-3
	C15H11.9	WBGene00007617	rrbs-1	+	+	1-5
	Y37H2A.12	WBGene00044758		-	-
	Y57A10A.27	WBGene00013267		-	-
	F44A2.5	WBGene00018405		-	-
	B0024.11	WBGene00007101		+	+	1-10
	E_BE45912.2	WBGene00017153		-	-
	C04F12.5	WBGene00007299		-	-
	Y53F4B.4	WBGene00013151		+	+	1-3
	T06E6.1	WBGene00011538		-	-
	ZK1127.5	WBGene00022852		-	-
	F49D11.10	WBGene00045433		-	-
	C25A1.10	WBGene00000931	dao-5	+	-
	Y66H1B.2	WBGene00022048	fln-1	+	+	1-10
	K07F5.16	WBGene00010640		-	-
	Y20F4.3	WBGene00021238	gap-3	-	-
	Y48A6B.3	WBGene00012964		-	-
	F31E3.5	WBGene00001168		-	-
	F14D2.11	WBGene00017459		-	-
	K01G5.5	WBGene00010478		+	+	1-10

## Sheet: herm_cluster3-1111110000
Analysis of the comparison between NEXTDB in situ images to transcriptome data
Profile 1111110000
Colomn E indicates whether there is an informative image of an adult worm in NEXTDB (- for no, + for yes)
Colomn F indicates whether in this image there is a specific staining of the gonad (- for no, + for yes, ? For undetermined)
Colomn G indicates the estimation of the region in the gonad in which staining was enriched (1-10 corresponds to the sections according to the main manuscript, ? Undetermined)
	Open reading frame	wbgene	Gene name	Stained adult worm image in NEXTDB	Specific gonad staining on adult worm	Estimated sections enriched staining
	Y71F9AL.13	WBGene00004412	rpl-1	-	-
	T08B2.10	WBGene00004486	rps-17	-	-
	F56E10.4	WBGene00004496	rps-27	+	+	1-6
	C42C1.14	WBGene00004448	rpl-34	-	-
	ZK652.4	WBGene00004449	rpl-35	+	+	1-6
	D1007.12	WBGene00004436		+	+	1-6
	C26F1.9	WBGene00004453	rpl-39	+	+	1-5
	Y71A12B.1	WBGene00004475	rps-6	+	+	1-5
	F13B10.2	WBGene00004414	rpl-3	+
	F37C12.4	WBGene00004450	rpl-36	+	+	1-5
	F37C12.11	WBGene00004490	rps-21	+	+	1-5
	C53H9.1	WBGene00004441	rpl-27	+	+	1-5
	F40F8.10	WBGene00004478	rps-9	+	+	1-5
	Y106G6H.3	WBGene00004444	rpl-30	+	+	1-5
	C06B8.8	WBGene00004452	rpl-38	-	-
	F40F11.1	WBGene00004480	rps-11	+	+	1-5
	R13A5.8	WBGene00004420	rpl-9	+	+	1-5
	K11H12.2	WBGene00004427	rpl-15	-	-
	B0250.1	WBGene00004413	rpl-2	+	-
	T01C3.6	WBGene00004485	rps-16	-	-
	C14B9.7	WBGene00004433	rpl-21	+	+	1-5

## Sheet: herm_cluster4-0001110000
Analysis of the comparison between NEXTDB in situ images to transcriptome data
Profile 0001110000
Colomn E indicates whether there is an informative image of an adult worm in NEXTDB (- for no, + for yes)
Colomn F indicates whether in this image there is a specific staining of the gonad (- for no, + for yes, ? For undetermined)
Colomn G indicates the estimation of the region in the gonad in which staining was enriched (1-10 corresponds to the sections according to the main manuscript, ? Undetermined)
	Open reading frame	wbgene	Gene name	Stained adult worm image in NEXTDB	Specific gonad staining on adult worm	Estimated sections enriched staining
	Y66D12A.16	WBGene00013442		-	-
	Y53G8AR.2	WBGene00021810	phf-15	+	+	3-8
	K12B6.8	WBGene00019672		-	-
	ZK688.3	WBGene00022798		-	-
	M163.3	WBGene00001898	his-24	-	-
	Y17G7B.3	WBGene00012459		-	-
	ZK1127.7	WBGene00022854	cin-4	-	-
	T21B10.1	WBGene00011883	mrpl-50	-	-
	F59H6.1	WBGene00019132	bath-19	-	-
	Y54G2A.19	WBGene00021884		-	-
	C37A2.2	WBGene00004110	pqn-20	+	+	4-10
	C09E7.7	WBGene00015641		-	-
	ZK632.14	WBGene00014020		-	-
	F59A7.12	WBGene00044520		-	-
	K09D9.12	WBGene00019569		-	-
	W01A8.8	WBGene00044988		-	-
	ZK1098.11	WBGene00014226		-	-
	F26A3.1	WBGene00009140		-	-
	F28F8.9	WBGene00044188		-	-
	T05A7.4	WBGene00001976	hmg-11	-	-
	F10B5.6	WBGene00001281	emb-27	-	-
	Y116A8C.12	WBGene00000184	arf-6	+	+	3-7
	R10D12.13	WBGene00011194		-	-
	Y50D4A.2	WBGene00021736	wrb-1	-	-
	F57C9.1	WBGene00019008		-	-
	R144.5	WBGene00020095		-	-
	ZK675.2	WBGene00014066	rev-1	+	+	1-10
	F09G2.2	WBGene00017311		+	+	3-7
	T21C9.2	WBGene00006934	vps-54	-	-
	EEED8.10	WBGene00017138		-	-
	C35D10.17	WBGene00016452		+	+	1-10
	Y42H9AR.3	WBGene00021538	rabs-5	-	-
	Y6D1A.1	WBGene00012395		+	+	4-6
	F46E10.8	WBGene00006721	ubh-1	-	-
	Y67D2.4	WBGene00022054		-	-
	F59E12.10	WBGene00019125	ddl-1	-	-
	Y55B1AL.3	WBGene00021905	hel-308	+	+	3-7
	Y71H2AM.3	WBGene00022168		-	-
	R07E5.11	WBGene00011117		-	-
	F12F6.3	WBGene00004360	rib-1	-	-
	D1086.4	WBGene00001864	him-5	-	-
	B0495.5	WBGene00015204		-	-
	C17E4.4	WBGene00007644		-	-
	Y48C3A.8	WBGene00012990	sam-10	-	-
	ZK180.3	WBGene00022677		+	+	3-7
	T03F6.1	WBGene00011398	qdpr-1	-	-
	F43G9.12	WBGene00009672		+	+	4-5
	C33D3.1	WBGene00001250	elt-2	+	+	2-4
	M142.6	WBGene00010923	rle-1	+	+	1-10
	K12D12.5	WBGene00010787		+	+	3-10
	C25H3.3	WBGene00016112		-	-
	T11F8.2	WBGene00020434		-	-
	JC8.13	WBGene00006466	tag-115	-	-
	Y5F2A.4	WBGene00012385		-	-
	F26H11.6	WBGene00194892		-	-
	H05L14.2	WBGene00010367		+	+	1-10
	Y73B6A.4	WBGene00004885	smg-7	-	-
	F38B7.5	WBGene00001110	duo-1	-	-
	F26A3.2	WBGene00009141	ncbp-2	+	+	3-5

## Sheet: herm_cluster5-0011111111
Analysis of the comparison between NEXTDB in situ images to transcriptome data
Profile 0011111111
Colomn E indicates whether there is an informative image of an adult worm in NEXTDB (- for no, + for yes)
Colomn F indicates whether in this image there is a specific staining of the gonad (- for no, + for yes, ? For undetermined)
Colomn G indicates the estimation of the region in the gonad in which staining was enriched (1-10 corresponds to the sections according to the main manuscript, ? Undetermined)
	Open reading frame	wbgene	Gene name	Stained adult worm image in NEXTDB	Specific gonad staining on adult worm	Estimated sections enriched staining
	C25A1.8	WBGene00007709	clec-87	+	+	6-10
	T05G5.7	WBGene00011501	rmd-1	+	+	3-10
	Y51F10.2	WBGene00021763		+	+	3-10
	F21G4.2	WBGene00003410	mrp-4	+	+	1-10
	F43D9.4	WBGene00004798	sip-1	+	+	1-10
	ZC308.4	WBGene00022586		-	-
	T25E12.5	WBGene00012020	gyg-2	+	+	4-10
	F38E1.7	WBGene00003395	mom-2	-	-
	F54C9.8	WBGene00004241	puf-5	+	+	3-10
	EEED8.3	WBGene00017134		-	-
	W05F2.3	WBGene00021035		+	+	4-10
	T11F8.3	WBGene00004374	rme-2	+	+	?
	Y46E12BL.3	WBGene00021596	spsb-2	-	-
	T23G11.2	WBGene00001647	gna-2	+	+	3-10
	F02E8.4	WBGene00017177		-	-
	C36B1.12	WBGene00007979	imp-1	+	+	3-10
	C07G2.1	WBGene00000465	cpg-1	-	-
	C08B11.1	WBGene00006996	zyg-11	-	-
	F52E1.1	WBGene00004078	pos-1	+	+	3-10
	C27D9.1	WBGene00016163		-	-
	T22F3.3	WBGene00020696		+	+	1-10
	T01C3.3	WBGene00011320		+	+	5-8
	F29F11.1	WBGene00005022	sqv-4	+	+	3-10

## Sheet: herm_cluster6-0000011100
Analysis of the comparison between NEXTDB in situ images to transcriptome data
Profile 0000011100
Colomn E indicates whether there is an informative image of an adult worm in NEXTDB (- for no, + for yes)
Colomn F indicates whether in this image there is a specific staining of the gonad (- for no, + for yes, ? For undetermined)
Colomn G indicates the estimation of the region in the gonad in which staining was enriched (1-10 corresponds to the sections according to the main manuscript, ? Undetermined)
	Open reading frame	wbgene	Gene name	Stained adult worm image in NEXTDB	Specific gonad staining on adult worm	Estimated sections enriched staining
	F16H11.3	WBGene00017532		-	-
	Y27F2A.3	WBGene00005552	sri-40	-	-
	F22E12.4	WBGene00001178	egl-9	+	+	1-10
	C41G7.7	WBGene00008064		-	-
	F18H3.3	WBGene00003903	pab-2	+	?	?
	Y46H3C.5	WBGene00021605		-	-
	T14G8.3	WBGene00011771		+	?	?
	ZK1151.1	WBGene00006876	vab-10	-	-
	F22F1.1	WBGene00001854	hil-3	+	+	5-8
	Y9D1A.2	WBGene00021187		-	-
	C37A2.5	WBGene00004111	pqn-21	-	-
	ZK688.7	WBGene00022802		-	-
	T24E12.1	WBGene00020771		-	-
	Y9D1A.1	WBGene00021186		+	+	5-10
	T07F12.2	WBGene00020322		+	?	?
	F59C12.4	WBGene00045272		-	-
	T28F2.2	WBGene00020901		-	-
	Y8G1A.2	WBGene00002135	inx-13	-	-
	C01B12.2	WBGene00015285	gmeb-1	-	-
	C25A8.4	WBGene00016084		+	+	4-8
	F47G3.3	WBGene00018578		-	-
	K07E3.8	WBGene00006890	vem-1	-	-
	F13C5.2	WBGene00017423		-	-
	C18B12.6	WBGene00007668		-	-
	ZK20.6	WBGene00013926	nep-1	+	+	5-10
	R31.1	WBGene00004855	sma-1	+	+	5-8
	F45C12.2	WBGene00018433	ceh-82	-	-
	H40L08.1	WBGene00010433		-	-
	F38E9.5	WBGene00018187		+	+	5-10
	Y75B12B.1	WBGene00013567		-	-
	R04D3.4	WBGene00011012		+	?	?
	F14H12.4	WBGene00017472	cst-1	-	-
	K07E3.2	WBGene00019491		-	-
	T26C11.7	WBGene00000460	ceh-39	+	-
	F45C12.12	WBGene00018443	btb-7	-	-
	F09C8.2	WBGene00008622		+	+	4-10
	F19B10.10	WBGene00017589		+	+	4-10
	Y51A2D.17	WBGene00003660	nhr-70	-	-
	F59A6.1	WBGene00003822	nsy-1	+	+	4-10
	Y94H6A.10	WBGene00022382		-	-
	Y47D3B.9	WBGene00012943	bed-2	+	+	6-8
	F55C10.1	WBGene00000554	cnb-1	-	-
	F11C1.5	WBGene00008694		+	+	5-9
	T19C3.4	WBGene00020562		+	+	6-10

## Sheet: herm_cluster7-0000001111
Analysis of the comparison between NEXTDB in situ images to transcriptome data
Profile 0000001111
Colomn E indicates whether there is an informative image of an adult worm in NEXTDB (- for no, + for yes)
Colomn F indicates whether in this image there is a specific staining of the gonad (- for no, + for yes, ? For undetermined)
Colomn G indicates the estimation of the region in the gonad in which staining was enriched (1-10 corresponds to the sections according to the main manuscript, ? Undetermined)
	Open reading frame	wbgene	Gene name	Stained adult worm image in NEXTDB	Specific gonad staining on adult worm	Estimated sections enriched staining
	C44B7.5	WBGene00016627		+	+	8-10
	F49E12.1	WBGene00009897		+	+	7-10
	C44B12.1	WBGene00016636	perm-2	+	+	6-10
	R04D3.3	WBGene00011011		+	+	6-10
	F48E3.4	WBGene00018605		+	+	8-10
	F49E12.2	WBGene00009898	dod-23	-	-
	C07D8.6	WBGene00015565		+	+	5-10
	C39D10.7	WBGene00016534		+	+	6-10
	K08A8.1	WBGene00003185	mek-1	-	-
	F08F3.6	WBGene00017263		+	+	5-10
	C14F11.1	WBGene00015778		-	-
	C44B12.5	WBGene00016638	perm-4	+	+	6-10
	F54F7.2	WBGene00010064		-	-
	ZK792.2	WBGene00002130	inx-8	+	+	6-10
	C07A12.4	WBGene00003963	pdi-2	-	-
	F11G11.2	WBGene00001755	gst-7	+	+	5-10
	F20B6.2	WBGene00006921	vha-12	-	-
	F52D10.3	WBGene00001502	ftt-2	+	+	6-10
	K02B9.1	WBGene00010492	meg-1	+	+	5-10
	F52E4.1	WBGene00018701	pccb-1	+	-
	K04C1.5	WBGene00010555		-	-
	F20H11.5	WBGene00017648	ddo-3	-	-
	C04B4.2	WBGene00007290		-	-
	B0403.4	WBGene00015168	tag-320	-	-
	R06C7.4	WBGene00011063	cpg-3	+	+	4-10
